# Supplementary material for: Associations between Plasma Essential Metals Levels and the Risks of All-Cause Mortality and Cardiovascular Disease Mortality among Individuals with Type 2 Diabetes
Source: MDPI journal article supplement (doi:10.3390/nu15051198), 2023-02-27
Supplement: s1 [file s1]

## Table of Contents

**Figure S1.** Flowchart of the participants included in the present study.

**Figure S2.** Spearman correlation heatmap of plasma metals.

**Figure S3.** Adjusted hazard ratios (95%CI) for all-cause mortality among type 2 diabetes individuals with higher level of iron.

**Figure S4.** Adjusted hazard ratios (95%CI) for all-cause mortality among type 2 diabetes individuals with higher level of copper.

**Figure S5.** Adjusted hazard ratios (95%CI) for all-cause mortality among type 2 diabetes individuals with higher level of selenium.

**Figure S6.** Adjusted hazard ratios (95%CI) for CVD mortality among type 2 diabetes individuals with higher level of iron.

**Figure S7.** The restricted cubic spline for the association between plasma iron and CVD mortality among type 2 diabetes.

**Table S1.** Limits of detection and percentages of samples below detection limits of study participants at baseline (n = 5278).

**Table S2.** The coefficient profiles for the metals derived from the LASSO regression model

**Table S3.** Sensitivity analyses to explore the hazard ratios (95%CI) for all-cause and cardiovascular mortality in patients with type 2 diabetes.

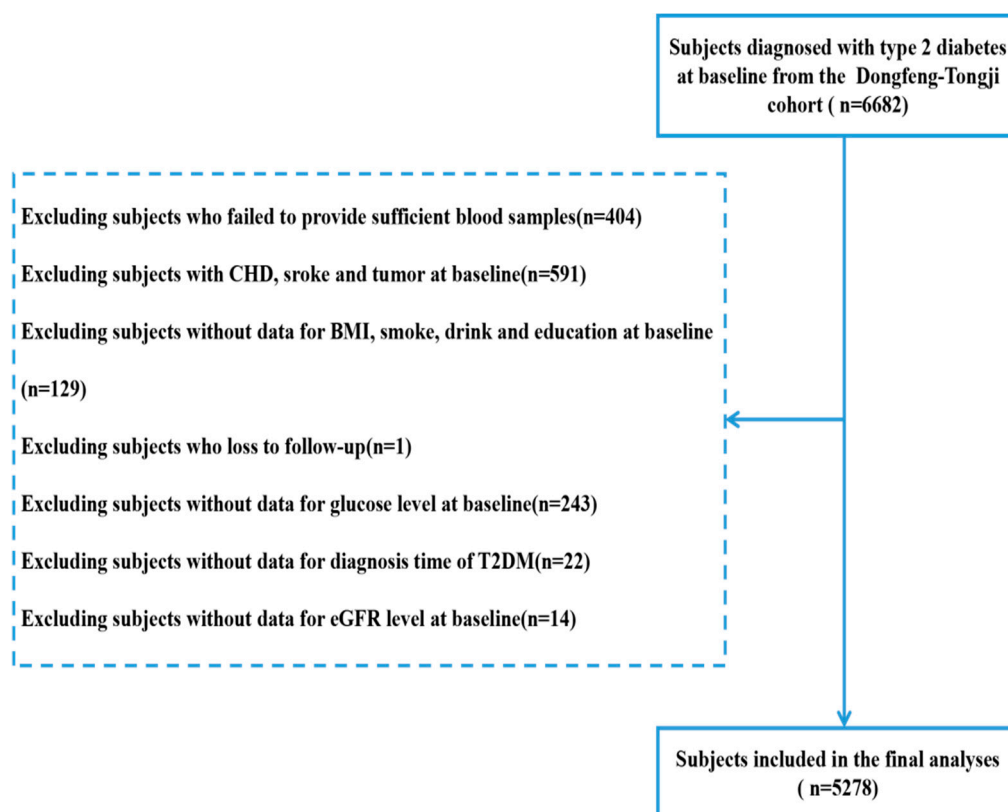

Figure S1. Flowchart of the participants included in the present study.

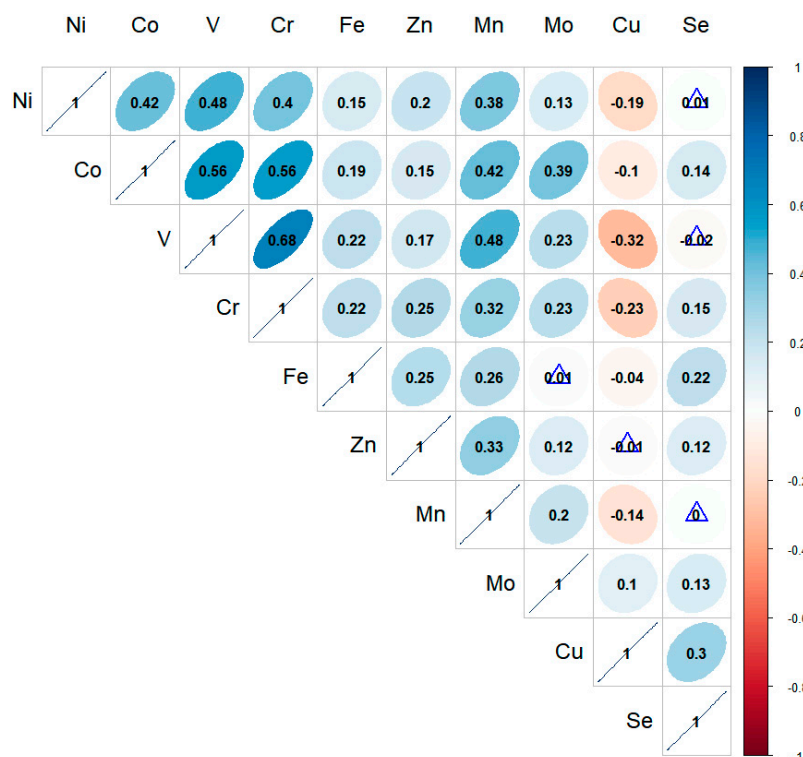

Figure S2. Spearman correlation heatmap of plasma metals. Metals without significant correlations are marked with blue triangles.

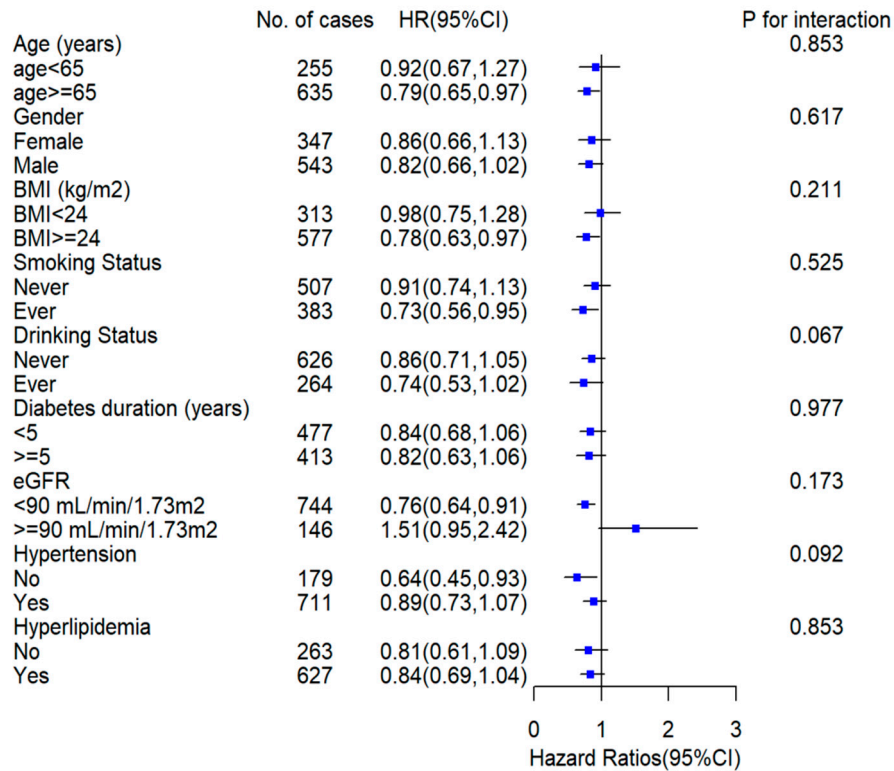

**Figure S3. Adjusted hazard ratios (95% CI) for all-cause mortality among type 2 diabetes individuals with higher level of iron.** All covariates were age, sex, BMI, education, smoking status, drinking status, physical activity status, baseline FBG, duration of diabetes, use of antidiabetics and eGFR at baseline. Each group adjusted for the other covariates except itself.

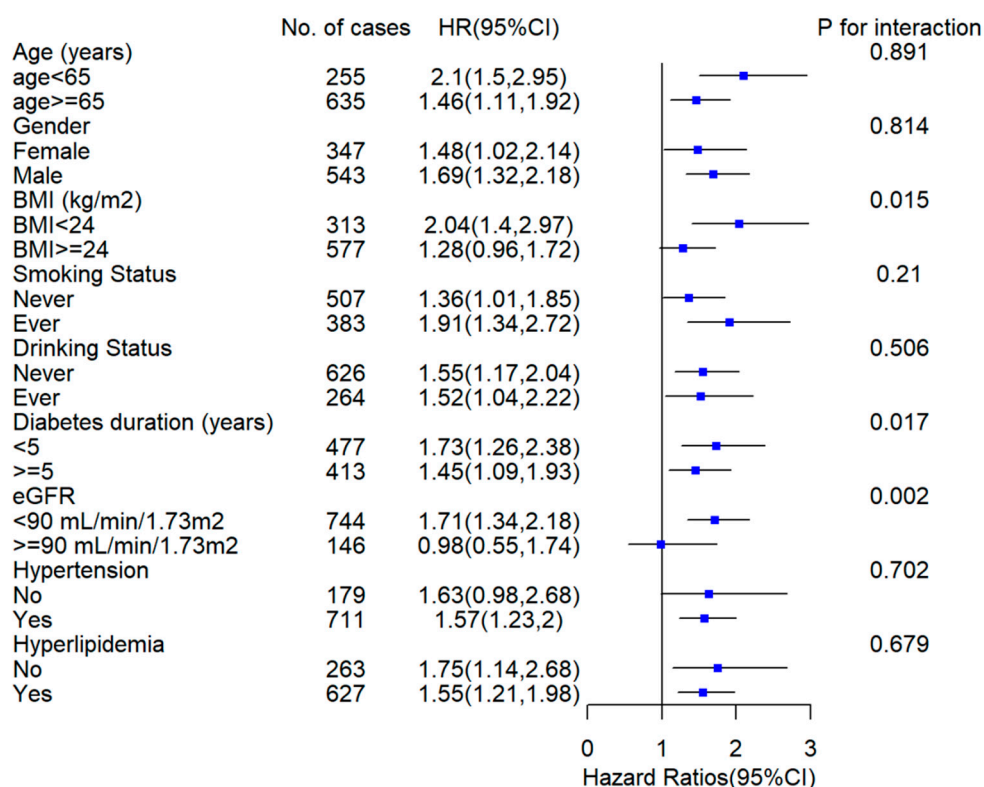

**Figure S4. Adjusted hazard ratios (95% CI) for all-cause mortality among type 2 diabetes individuals with higher level of copper.** All covariates were age, sex, BMI, education, smoking status, drinking status, physical activity status, baseline FBG, duration of diabetes, use of antidiabetics and eGFR at baseline. Each group adjusted for the other covariates except itself.

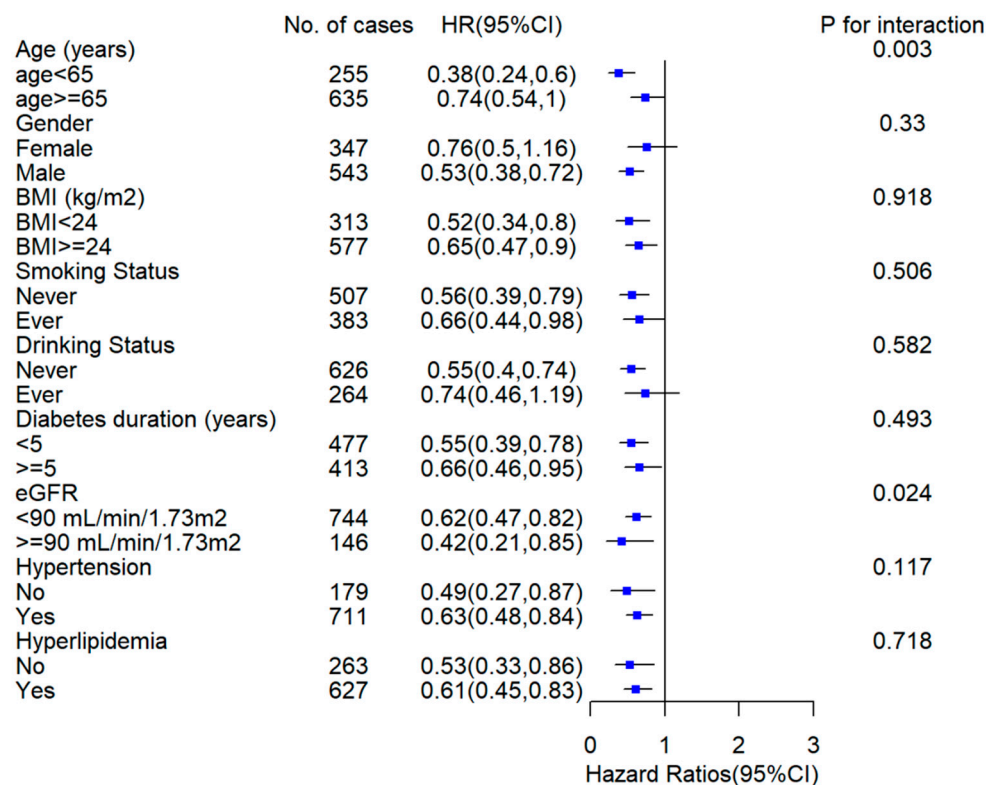

**Figure S5. Adjusted hazard ratios (95% CI) for all-cause mortality among type 2 diabetes individuals with higher level of selenium.** All covariates were age, sex, BMI, education, smoking status, drinking status, physical activity status, baseline FBG, duration of diabetes, use of antidiabetics and eGFR at baseline. Each group adjusted for the other covariates except itself.

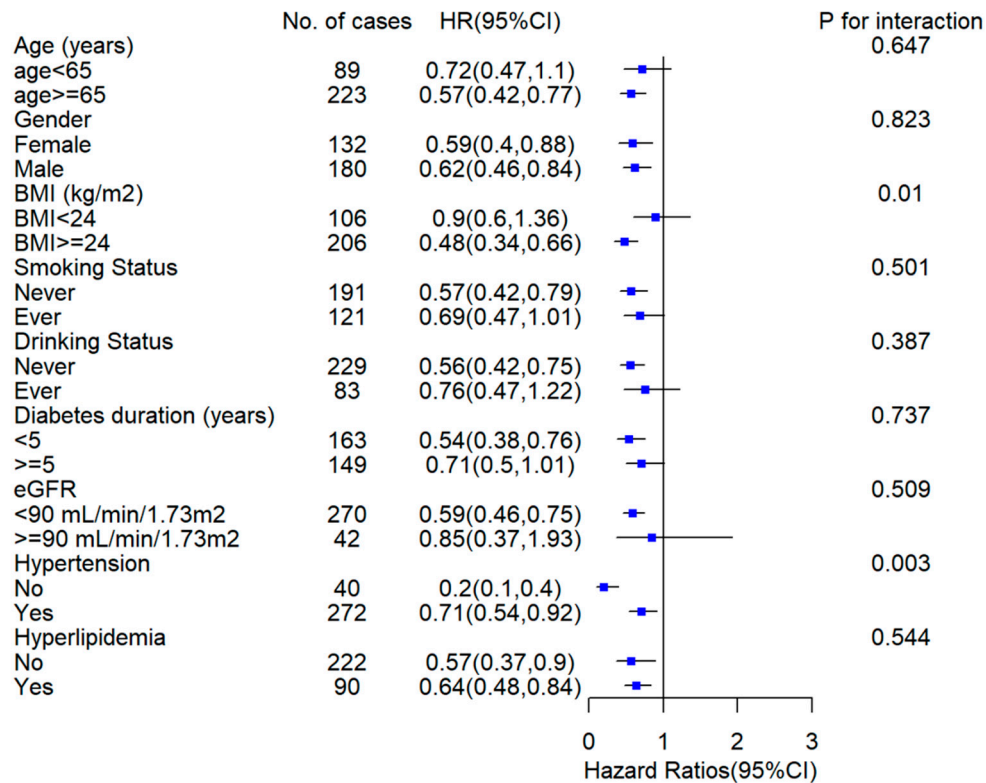

**Figure S6. Adjusted hazard ratios (95% CI) for CVD mortality among type 2 diabetes individuals with higher level of iron.** All covariates were age, sex, BMI, education, smoking status, drinking status, physical activity status, family history of CVD, baseline FBG, duration of diabetes, use of antidiabetics and eGFR at baseline. Each group adjusted for the other covariates except itself.

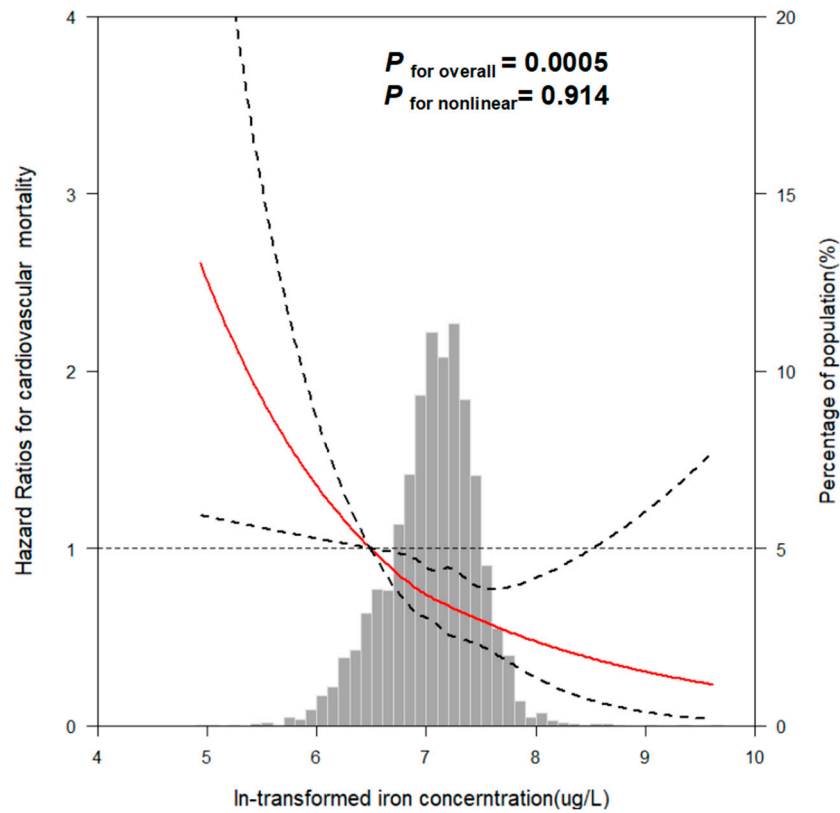

**Figure S7. The restricted cubic spline for the association between plasma iron and CVD mortality among type 2 diabetes.** Knots were placed at the 20th, 40th, 60th and 80th percentile of the distribution of plasma metal concentration, with the reference value were set at the 10th percentile. The black line was hazard ratio; dashed lines were 95% confidence intervals. Adjustment factors were age, sex, BMI, education, smoking status, drinking status, physical activity status, family history of CVD, baseline FBG, duration of diabetes, use of antidiabetics and eGFR at baseline.

**Table S1. Limits of detection and percentages of samples below detection limits of study participants at baseline (n = 5278).**

| Plasma metals (µg/L) | LOD     | Total No. (%) < LOD |
|----------------------|---------|---------------------|
| Iron                 | 0.17637 | 0(0.00)             |
| Copper               | 0.00384 | 1(0.02)             |
| Zinc                 | 0.21972 | 0(0.00)             |
| Selenium             | 0.00969 | 1(0.02)             |
| Manganese            | 0.00507 | 24(0.46)            |
| Molybdenum           | 0.00126 | 44(0.83)            |
| Vanadium             | 0.00129 | 0(0.00)             |
| Cobalt               | 0.00099 | 89(1.69)            |
| Chromium             | 0.0204  | 21(0.39)            |
| Nickel               | 0.01146 | 65(1.23)            |
| Tin                  | 0.003   | 1008(19.09)         |

Abbreviations: LOD, limit of detection.



**Table S2.** The coefficient profiles for the metals derived from the LASSO regression model.

| Metals     | Coefficients                     |                                           |
|------------|----------------------------------|-------------------------------------------|
|            | All-cause mortality <sup>#</sup> | Cardiovascular mortality <sup>&amp;</sup> |
| Iron       | -0.123                           | -0.306                                    |
| Copper     | 0.358                            | /                                         |
| Zinc       | -0.020                           | /                                         |
| Selenium   | -0.399                           | /                                         |
| Chromium   | /                                | /                                         |
| Manganese  | /                                | /                                         |
| Molybdenum | 0.023                            | /                                         |
| Cobalt     | /                                | /                                         |
| Nickel     | /                                | /                                         |
| Tin        | /                                | /                                         |
| Vanadium   | /                                | /                                         |

<sup>#</sup>: Metals were ln-transformed and simultaneously included in the LASSO model, with adjustment for age, gender, BMI, education, smoking status, drinking status, physical activity status, baseline FBG, duration of diabetes, use of antidiabetics and eGFR at baseline. <sup>&</sup>: Metals were ln-transformed and simultaneously included in the Cox model, with adjustment for age, gender, BMI, education, smoking status, drinking status, physical activity status, baseline FBG, duration of diabetes and use of antidiabetics, family history of CVD, and eGFR at baseline.

**Table S3.** Sensitivity analyses to explore the hazard ratios (95% CI) for all-cause and cardiovascular mortality in patients with type 2 diabetes.

| Metals (µg/L)                                                                 | Hazard ratio (95% CIs)<br>by continuous metals | <i>P</i> | Hazard ratio (95% CIs)<br>by quartiles of metals |                 |                 |                 | <i>P</i> trend* |
|-------------------------------------------------------------------------------|------------------------------------------------|----------|--------------------------------------------------|-----------------|-----------------|-----------------|-----------------|
|                                                                               |                                                |          | Quartile1                                        | Quartile2       | Quartile3       | Quartile4       |                 |
| All-cause mortality <sup>#</sup>                                              |                                                |          |                                                  |                 |                 |                 |                 |
| Excluding the subjects who died within the first 2 years of follow-up (n=106) |                                                |          |                                                  |                 |                 |                 |                 |
| Iron                                                                          | 0.86(0.72,1.03)                                | 0.095    | 1.00 (ref.)                                      | 0.91(0.75,1.12) | 0.83(0.68,1.03) | 0.81(0.65,1.00) | 0.022           |
| Copper                                                                        | 1.50(1.21,1.87)                                | <0.001   | 1.00 (ref.)                                      | 1.11(0.91,1.35) | 1.13(0.91,1.40) | 1.42(1.15,1.76) | 0.004           |
| Zinc                                                                          | 0.97(0.90,1.05)                                | 0.46     | 1.00 (ref.)                                      | 0.77(0.63,0.94) | 0.94(0.75,1.17) | 0.96(0.80,1.16) | 0.631           |
| Selenium                                                                      | 0.62(0.48,0.81)                                | 0.001    | 1.00 (ref.)                                      | 0.81(0.67,0.99) | 0.72(0.58,0.88) | 0.77(0.62,0.96) | 0.002           |
| Molybdenum                                                                    | 1.11(0.99,1.25)                                | 0.075    | 1.00 (ref.)                                      | 0.88(0.70,1.11) | 1.13(0.91,1.40) | 1.19(0.96,1.48) | 0.018           |
| Excluding the subjects whose eGFR<60mL/min/1.73 m² at baseline (n=868)        |                                                |          |                                                  |                 |                 |                 |                 |
| Iron                                                                          | 0.87(0.71,1.07)                                | 0.178    | 1.00 (ref.)                                      | 0.85(0.68,1.06) | 0.78(0.62,0.99) | 0.79(0.62,1.00) | 0.022           |
| Copper                                                                        | 1.62(1.29,2.03)                                | <0.001   | 1.00 (ref.)                                      | 1.08(0.86,1.34) | 0.97(0.77,1.23) | 1.36(1.07,1.73) | 0.062           |
| Zinc                                                                          | 0.98(0.90,1.07)                                | 0.661    | 1.00 (ref.)                                      | 0.79(0.64,0.99) | 0.91(0.72,1.16) | 0.94(0.76,1.17) | 0.856           |
| Selenium                                                                      | 0.55(0.41,0.74)                                | <0.001   | 1.00 (ref.)                                      | 0.77(0.62,0.95) | 0.65(0.51,0.82) | 0.66(0.52,0.85) | <0.001          |
| Molybdenum                                                                    | 1.00(0.91,1.11)                                | 0.925    | 1.00 (ref.)                                      | 0.90(0.71,1.15) | 1.02(0.81,1.28) | 1.09(0.86,1.37) | 0.23            |
| Excluding the subjects who died accidentally during follow-up (n=21)          |                                                |          |                                                  |                 |                 |                 |                 |
| Iron                                                                          | 0.83(0.70,0.99)                                | 0.035    | 1.00 (ref.)                                      | 0.92(0.76,1.11) | 0.81(0.67,0.99) | 0.79(0.64,0.97) | 0.007           |
| Copper                                                                        | 1.62(1.31,2.01)                                | <0.001   | 1.00 (ref.)                                      | 1.05(0.87,1.28) | 1.04(0.85,1.27) | 1.50(1.23,1.84) | <0.001          |
| Zinc                                                                          | 0.96(0.89,1.03)                                | 0.271    | 1.00 (ref.)                                      | 0.79(0.66,0.96) | 0.94(0.77,1.16) | 0.93(0.78,1.12) | 0.95            |
| Selenium                                                                      | 0.61(0.47,0.78)                                | <0.001   | 1.00 (ref.)                                      | 0.83(0.69,1.00) | 0.73(0.60,0.89) | 0.74(0.6,0.91)  | 0.001           |

|                                                                                     |                 |        |             |                 |                 |                 |        |
|-------------------------------------------------------------------------------------|-----------------|--------|-------------|-----------------|-----------------|-----------------|--------|
| Molybdenum                                                                          | 1.08(0.97,1.20) | 0.146  | 1.00 (ref.) | 0.93(0.75,1.15) | 1.12(0.91,1.37) | 1.18(0.96,1.45) | 0.02   |
| Cardiovascular mortality <sup>&amp;</sup>                                           |                 |        |             |                 |                 |                 |        |
| Excluding the subjects who died of CVD within the first 2 years of follow-up (n=20) |                 |        |             |                 |                 |                 |        |
| Iron                                                                                | 0.61(0.48,0.78) | <0.001 | 1.00 (ref.) | 0.68(0.49,0.94) | 0.71(0.52,0.96) | 0.53(0.38,0.74) | <0.001 |
| Excluding the subjects whose eGFR<60mL/min/1.73 m <sup>2</sup> at baseline (n=868)  |                 |        |             |                 |                 |                 |        |
| Iron                                                                                | 0.62(0.47,0.81) | 0.001  | 1.00 (ref.) | 0.68(0.47,0.98) | 0.58(0.40,0.84) | 0.53(0.36,0.77) | <0.001 |
| Excluding the subjects who died accidentally during follow-up (n=21)                |                 |        |             |                 |                 |                 |        |
| Iron                                                                                | 0.61(0.49,0.78) | <0.001 | 1.00 (ref.) | 0.7(0.51,0.95)  | 0.68(0.5,0.93)  | 0.52(0.37,0.71) | <0.001 |

#: Metals were ln-transformed and simultaneously included in the Cox model, with adjustment for age, sex, BMI, education, smoking status, drinking status, physical activity status, baseline FBG, duration of diabetes, use of antidiabetics and eGFR at baseline.

&: Metals were ln-transformed and simultaneously included in the Cox model, with adjustment for age, sex, BMI, education, smoking status, drinking status, physical activity status, baseline FBG, duration of diabetes and use of antidiabetics, family history of CVD, and eGFR at baseline.

\*: *P* trend across quartile of metals were obtained by including the median of each quartile (natural ln-transformed) as a continuous variable in the Cox models.
